# Supplementary material
Source: PubMed Central journal article supplement (PMC8324673)
Supplement: 42770_2021_532_MOESM1_ESM.pdf [file 42770_2021_532_MOESM1_ESM.pdf]

**Additional files:**

**Fig. S1 SDS-PAGE analysis of BMGlvA2 produced by *E. coli* Rosetta.**

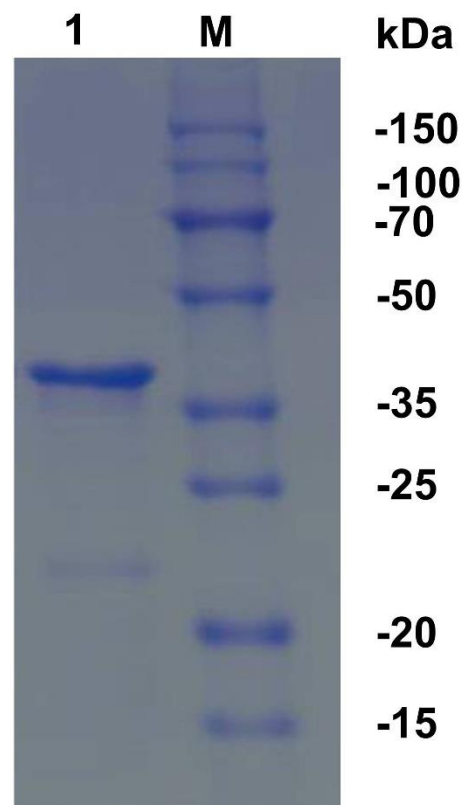

Purification of BMGlvA2. M protein markers (DL 150Kda), Lane 1 BMGlvA2 purified by Ni<sup>2+</sup>-IDA affinity chromatography.
